# Supplementary material
Source: PubMed Central journal article supplement (PMC3622174)

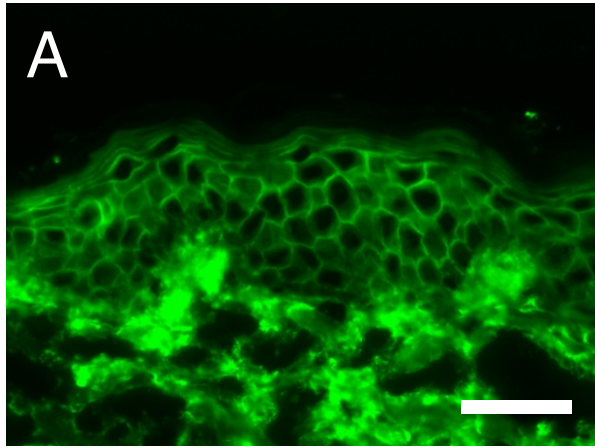

TPF1

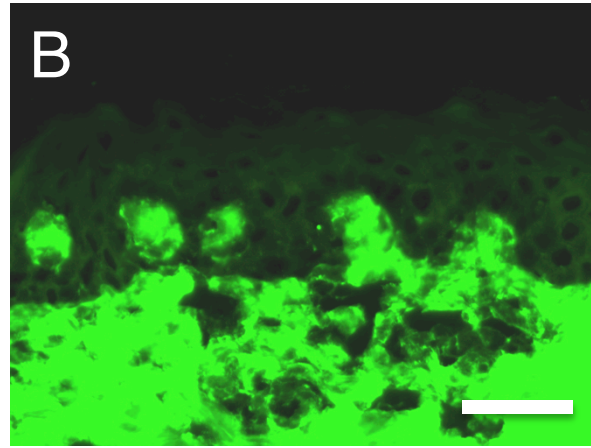

THR2

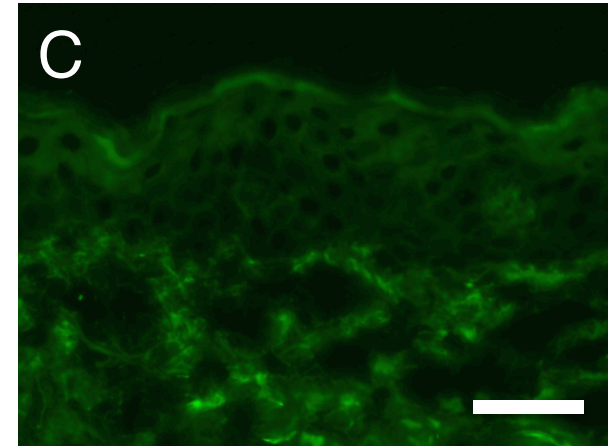

THR5

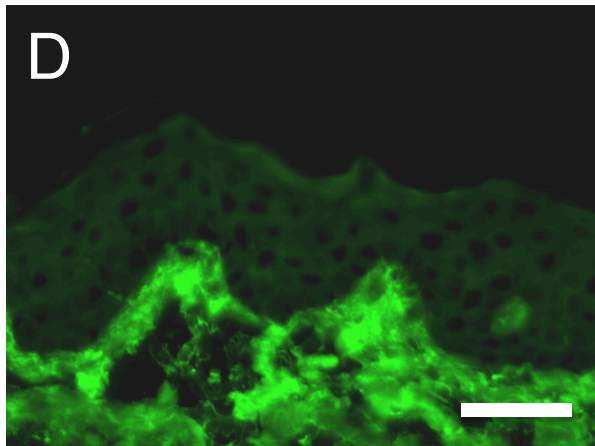

THC6

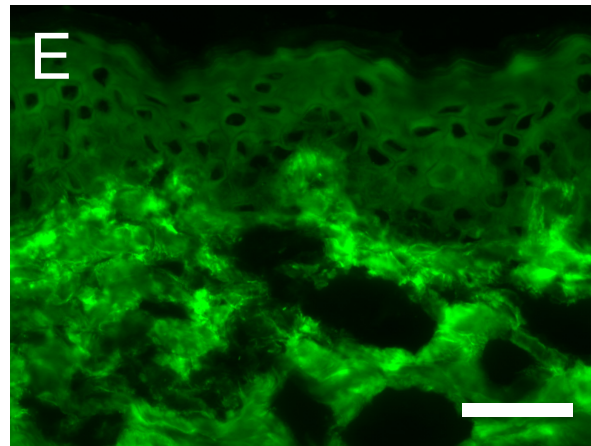

THC8

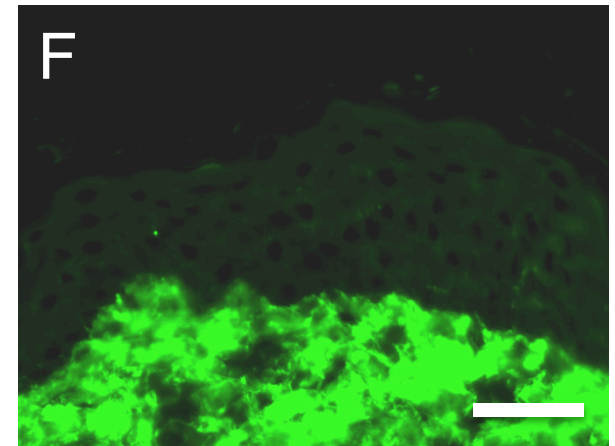

THC9

Supplement: NIHMS451898-supplement-Supp_Fig_1.pdf [file NIHMS451898-supplement-Supp_Fig_1.pdf]
